# Supplementary material for: Molecular Sieve Compositing Strategy Enabling Tandem Ammoxidation-Oxidation to 2-Nitropropane: Catalyst Design and Industrial-Scale Separation
Source: Research Square preprint supplement (doi:10.21203/rs.3.rs-7983783/v1), 2025-11-14
Supplement: Supplementary file 1 [file 8566d2d1bd65470dac4a43ad.docx]

**Molecular Sieve Compositing Strategy Enabling Tandem Ammoxidation-Oxidation to 2-Nitropropane: Catalyst Design and Industrial-Scale Separation**

Jie Liu1, Qingyan Chu 1, *, Guangliang Wang, Xiaoyang Zhang, Xiaowei Feng, Tengfei Wang, Tong Li, Ping Wang**

*(School of Chemistry and Chemical Engineering, Shandong University of Technology, Zibo, 255049, China)*

** Corresponding author: Qingyan Chu , Tel:* *+86-18560253639(Chu)*

*** Corresponding author: Ping Wang, Tel: +86-13561652707(Wang)*

## Abstract

Conventional nitration methods using concentrated nitric acid pose significant safety and environmental risks. To address this, a dual-base-modified composite catalyst (TS-1@Ti-MWW-OH) was designed for efficient 2-nitropropane synthesis via acetone ammoxidation/oxidation. Structural characterization confirmed that compositing TS-1 with Ti-MWW and modifying with 4-methoxypyridine/ethanolamine increased specific surface area (32%), pore volume (28%), and pore size (1.8 nm), enhancing mass transfer and active site accessibility. Mechanistic studies revealed a synergistic relay catalysis: Ti4+ sites on Ti-MWW catalyzed acetone→acetone oxime conversion, while Ti4+ on TS-1 oxidized oxime→2-nitropropane, achieving 92.2% yield. Process simulation via Aspen Plus V14 demonstrated industrial-scale production of 13,000 t/year 2-nitropropane (≥99.99 wt%) and 760 t/year acetone oxime (≥99.8 wt%), with stable operation ≥8,000 h/year validated by RADFRAC and tray hydraulics analysis. Additionally, column sizing (height and diameter) and tray hydraulics analysis performed using the Tray Sizing module confirmed that the maximum flooding ratio remains within permissible operating limits.This work provides a sustainable strategy for nitroalkane production through tailored catalyst design and optimized process engineering.

**Keywords: TS-1; Ammonia oxidation; Composite catalyst; Green catalysis; Distillation column**

## Catalyst preparation

All chemicals were used as received without further purification. Tetraethyl orthosilicate (TEOS), tetrabutyl orthotitanate (TBOT), tetrapropylammonium hydroxide (TPAOH, 25 wt.% in water), and isopropanol (analytical grade) were purchased from Macklin Biochemical Technology Co., Ltd. (Shanghai, China). Acetone (analytical grade), aqueous ammonia (28 wt.%), hydrogen peroxide (30 wt.%), acetone oxime (analytical grade), and 2-nitropropane (analytical grade) were obtained from Sinopharm Chemical Reagent Co., Ltd. (China). Ti-MWW, Ti-MOR, and ZSM-5 molecular sieves were synthesized in-house following established procedures.

### Preparation of TS-1 Molecular Sieve

First, tetraethyl orthosilicate (TEOS) was mixed with the structure-directing agent tetrapropyl ammonium hydroxide (TPAOH, 25% by weight) and stirred continuously at room temperature for 1 hour to initiate hydrolysis. Subsequently, tetrabutyl orthotitanate (TBOT) was dissolved in isopropanol and added dropwise to the hydrolyzed solution. An appropriate amount of deionized water was then introduced to the mixture, ensuring the molar ratio of SiO₂ : TiO₂ : TPAOH : H₂O = 1 : 0.033 : 0.25 : 26.3. The mixture was stirred at 90°C for 2 hours to thoroughly remove ethanol from the system. The mixture was then transferred to a Teflon-lined stainless steel autoclave for hydrothermal crystallization at 170°C for 3 days. After crystallization, the solid product was separated by centrifugation, washed repeatedly, and dried at 110°C for over 6 hours, followed by calcination at 550°C for 5 hours, yielding the TS-1 molecular sieve.

### Preparation of TS-1@ZSM-5 Composite Catalyst

Based on the preparation method of the TS-1 molecular sieve, 2 grams of ZSM-5 molecular sieve was added sequentially into the hydrolyzed solution after dissolving tetrabutyl orthotitanate (TBOT) in isopropanol. The remaining steps, including hydrolysis, stirring, hydrothermal crystallization, centrifugation and washing, drying, and calcination, were consistent with the TS-1 preparation process, ultimately yielding the TS-1@ZSM-5 composite catalyst.

### Preparation of TS-1@Ti-MWW Composite Catalyst

Based on the preparation method of the TS-1 molecular sieve, 2 grams of Ti-MWW molecular sieve was added sequentially into the hydrolyzed solution after dissolving tetrabutyl orthotitanate (TBOT) in isopropanol. The remaining steps, including hydrolysis, stirring, hydrothermal crystallization, centrifugation and washing, drying, and calcination, were consistent with the TS-1 preparation process, ultimately yielding the TS-1@Ti-MWW composite catalyst.

### Preparation of TS-1@Ti-MOR Composite Catalyst

Based on the preparation method of the TS-1 molecular sieve, 2 grams of Ti-MOR molecular sieve was added sequentially into the hydrolyzed solution after dissolving tetrabutyl orthotitanate (TBOT) in isopropanol. The remaining steps, including hydrolysis, stirring, hydrothermal crystallization, centrifugation and washing, drying, and calcination, were consistent with the TS-1 preparation process, ultimately yielding the TS-1@Ti-MOR composite catalyst.

### Secondary Modification of the Catalyst

The prepared catalysts were mixed with a modifier and water in a mass ratio of catalyst : modifier : water = 1 : 1 : 50 in a flask and reacted at 85°C for 12 hours. The reaction suspension was then transferred to a Teflon-lined stainless steel autoclave for hydrothermal crystallization at 170°C for 3 days. After crystallization, the solid product was separated by centrifugation, washed repeatedly, and dried at 110°C for over 6 hours, followed by calcination at 550°C for 5 hours, resulting in the modified catalyst.

Through the above methods, a series of TS-1-based composite catalysts were successfully prepared, and their performance was further optimized through secondary modification. This preparation process not only ensured the structural integrity of the catalysts but also provided the potential for their efficient application in specific reactions.

## Catalytic Activity Evaluation

The catalytic reaction was conducted in a standard three-neck flask, with the reaction system consisting of the substrate, catalyst, solvent, oxidant, and ammonia source. The specific operatidonal steps are as follows:

Reaction System Setup

First, 0.1 mol of acetone as the substrate and 0.5 g of the catalyst were added to the reaction flask. Subsequently, 20 mL of methanol was added as the solvent to ensure thorough dispersion of the reactants and the catalyst.

### Reaction Condition Control

The reaction system was heated to an initial temperature of 50°C. During this process, a peristaltic pump was used to simultaneously drip a pre-mixed solution of methanol, aqueous ammonia (as the ammonia source), and hydrogen peroxide (as the oxidant) into the reaction system. To ensure consistency and reproducibility, the drip rates of hydrogen peroxide and aqueous ammonia were precisely controlled so that they would finish dripping simultaneously, and this moment was defined as the reaction starting point (recorded as 0 minutes).

### Reaction Process Monitoring

During the reaction, the system was vigorously stirred using a magnetic stirrer to ensure full contact and mixing among the reactants, catalyst, and oxidant. The reaction temperature could be gradually increased based on experimental requirements to optimize the reaction kinetics.

### Reaction Termination and Product Analysis

After the reaction, the catalyst was separated by filtration to obtain the reaction solution. The reaction solution was then analyzed using gas chromatography (GC) to quantitatively detect the reaction products. In most cases, the reaction products primarily consisted of acetone oxime and 2-nitropropane, and their ratio could be controlled by optimizing reaction conditions such as temperature, and the concentrations of the oxidant and aqueous ammonia.

### Catalyst characterization

The crystal structure of the catalysts was characterized by X-ray diffraction (XRD) using a Rigaku Ultima IV diffractometer (Japan) with Cu-Kα radiation (λ = 1.5406 Å) operated at 40 kV and 20 mA. The diffraction patterns were recorded in the 2θ range of 5-80° with a scanning rate of 5°/min.UV-vis diffuse reflectance spectra (UV-vis DRS) were obtained using a Shimadzu UV-2400PC spectrophotometer (Japan) with BaSO4 as the reference. The spectra were collected in the range of 200-800 nm and converted to absorption spectra using the Kubelka-Munk function for optical property analysis.The surface chemical structure was analyzed by Fourier transform infrared spectroscopy (FT-IR) on a Nicolet-5700 spectrometer (USA). Samples were prepared as KBr pellets and scanned from 400 to 4000 cm⁻¹ with a resolution of 2 cm⁻¹.Morphological features were examined using field-emission scanning electron microscopy (FE-SEM, JEOL JSMT220, Japan) at an accelerating voltage of 30 kV. Prior to analysis, samples were sputter-coated with gold to enhance conductivity.High-resolution transmission electron microscopy (HR-TEM) was performed on a Tecnai G2F20 microscope (FEI, USA) at 200 kV. Samples were dispersed in ethanol and deposited on carbon-coated copper grids.Textural properties including specific surface area, pore volume and pore size distribution were determined by N2 adsorption-desorption at 77 K using a BEL-MAX analyzer (Japan). Samples were degassed at 573 K under vacuum for 12 h prior to measurement.

Gas chromatography (GC) analysis was conducted using an Agilent 7890B system equipped with an OV-1701 capillary column (50 m × 0.25 mm × 0.25 µm). The operating conditions were as follows: injector temperature 250°C, detector temperature 280°C; carrier gas (N2) flow rate 25 mL/min; air flow 300 mL/min; hydrogen flow 35 mL/min. The column temperature was maintained at 50°C with a programmed temperature ramp as shown in Figure S1





**Figure S1 The temperature-programmed profile for gas chromatography (GC) analysis**

**Table S1 BET test data for various catalysts**

|  | SBET(m2/g) | Sexter(m2/g) | VMicropores (cm3/g) | Average pore diameterb (Å) |
| --- | --- | --- | --- | --- |
| TS-1 | 404.6031 | 1519.1951 | 0.133233 | 28.107 |
| TS-1-OH | 328.6683 | 156.6411 | 0.095585 | 33.325 |
| TS-1@ZSM-5 | 391.7783 | 159.2059 | 0.127561 | 31.222 |
| TS-1@ZSM-5-OH | 355.006 | 103.2807 | 0.135365 | 31.805 |
| TS-1@Ti-MWW | 393.6671 | 167.7908 | 0.12448 | 29.509 |
| TS-1@Ti-MWW-OH | 342.3879 | 117.1282 | 0.124476 | 30.971 |
| TS-1@Ti-MOR | 364.6657 | 91.5455 | 0.149859 | 26.016 |
| TS-1@Ti-MOR-OH | 342.5287 | 138.5443 | 0.113968 | 30.36 |

**Table S2 List of Singularities by Component**

| **Temperature (℃)** | **Acetone** | **Acetoxime** | **2-nitropropane** | **Water** | **methanol** | **Benzene** |
| --- | --- | --- | --- | --- | --- | --- |
| 55.235 | 0.777 | 0 | 0 | 0 | 0.223 | 0 |
| 56.128 | 1 | 0 | 0 | 0 | 0 | 0 |
| 56.908 | 0 | 0 | 0 | 0.423 | 0 | 0.577 |
| 57.59 | 0.125 | 0 | 0 | 0.148 | 0.313 | 0.414 |
| 57.948 | 0 | 0 | 0 | 0 | 0.586 | 0.414 |
| 58.419 | 0.443 | 0 | 0 | 0.246 | 0 | 0.31 |
| 64.535 | 0 | 0 | 0 | 0 | 1 | 0 |
| 80.129 | 0 | 0 | 0 | 0 | 0 | 1 |
| 83.18 | 0 | 0 | 0.37 | 0.63 | 0 | 0 |
| 100.018 | 0 | 0 | 0 | 1 | 0 | 0 |
| 120.208 | 0 | 0 | 1 | 0 | 0 | 0 |
| 134.857 | 0 | 1 | 0 | 0 | 0 | 0 |

**Table S3 Gas-liquid distribution in detachment tower**

| Serial number | Liquid-phase mass flow rate  kg/h | Gas-phase mass flow rate  kg/h | Liquid-phase volumetric flow rate  m3/h | Gas-phase volumetric flow rate  m3/h | Liquid -phase density  kg/m3 | Gas-phase density  kg/m3 | Liquid -phase viscositycP |
| --- | --- | --- | --- | --- | --- | --- | --- |
| 1 | 242016.0140 | 297240.1560 | 0.0820 | 30.7860 | 819.9150 | 2.6820 | 0.3357 |
| 2 | 246092.6940 | 301316.8360 | 0.0838 | 31.1426 | 816.0184 | 2.6876 | 0.3245 |
| 3 | 246228.7560 | 301452.8980 | 0.0838 | 31.1543 | 815.8948 | 2.6878 | 0.3241 |
| 4 | 246232.4650 | 301456.6070 | 0.0838 | 31.1545 | 815.8962 | 2.6878 | 0.3241 |
| 5 | 246229.4260 | 301453.5680 | 0.0838 | 31.1542 | 815.9074 | 2.6878 | 0.3241 |
| 6 | 246222.9670 | 301447.1090 | 0.0838 | 31.1534 | 815.9292 | 2.6878 | 0.3241 |
| 7 | 246210.5110 | 301434.6530 | 0.0838 | 31.1520 | 815.9709 | 2.6878 | 0.3241 |
| 8 | 246186.5720 | 301410.7140 | 0.0838 | 31.1493 | 816.0507 | 2.6879 | 0.3241 |
| 9 | 246140.3200 | 301364.4620 | 0.0838 | 31.1442 | 816.2033 | 2.6879 | 0.3241 |
| 10 | 246049.9350 | 301274.0770 | 0.0837 | 31.1342 | 816.4968 | 2.6880 | 0.3242 |
| 11 | 245869.5560 | 301093.6980 | 0.0836 | 31.1148 | 817.0654 | 2.6880 | 0.3242 |
| 12 | 245496.1360 | 300720.2780 | 0.0833 | 31.0761 | 818.1814 | 2.6880 | 0.3243 |
| 13 | 244677.9230 | 299902.0650 | 0.0828 | 30.9970 | 820.4221 | 2.6876 | 0.3246 |
| 14 | 242781.1660 | 298005.3080 | 0.0817 | 30.8285 | 825.0583 | 2.6852 | 0.3250 |
| 15 | 238686.5060 | 293910.6480 | 0.0794 | 30.4769 | 834.6258 | 2.6788 | 0.3256 |
| 16 | 233304.9350 | 288529.0770 | 0.0762 | 29.9572 | 850.6739 | 2.6754 | 0.3246 |
| 17 | 231836.9670 | 287061.1090 | 0.0744 | 29.7098 | 865.5868 | 2.6839 | 0.3178 |
| 18 | 234156.7060 | 289380.8480 | 0.0746 | 29.8364 | 872.3182 | 2.6941 | 0.3091 |
| 19 | 236234.8020 | 291458.9440 | 0.0751 | 29.9903 | 874.2871 | 2.6996 | 0.3041 |
| 20 | 237207.3520 | 292431.4940 | 0.0753 | 30.0664 | 874.8286 | 2.7017 | 0.3020 |
| 21 | 237574.7450 | 292798.8870 | 0.0754 | 30.0956 | 874.9910 | 2.7025 | 0.3012 |
| 22 | 237703.3050 | 292927.4470 | 0.0755 | 30.1059 | 875.0434 | 2.7028 | 0.3009 |
| 23 | 237746.6080 | 292970.7500 | 0.0755 | 30.1093 | 875.0613 | 2.7028 | 0.3008 |
| 24 | 237760.0150 | 292984.1570 | 0.0755 | 30.1105 | 875.0683 | 2.7029 | 0.3008 |
| 25 | 237762.1170 | 292986.2590 | 0.0755 | 30.1107 | 875.0726 | 2.7029 | 0.3008 |
| 26 | 237758.1970 | 292982.3390 | 0.0755 | 30.1106 | 875.0777 | 2.7028 | 0.3008 |
| 27 | 237748.0590 | 292972.2010 | 0.0755 | 30.1101 | 875.0864 | 2.7028 | 0.3008 |
| 28 | 237727.8610 | 292952.0030 | 0.0755 | 30.1092 | 875.1025 | 2.7027 | 0.3008 |
| 29 | 237689.1290 | 292913.2710 | 0.0754 | 30.1073 | 875.1331 | 2.7025 | 0.3008 |
| 30 | 314220.2140 | 312483.1990 | 0.0997 | 31.2291 | 875.1913 | 2.7795 | 0.3008 |
| 31 | 321242.3610 | 319505.3450 | 0.1020 | 31.7999 | 874.7568 | 2.7909 | 0.2913 |
| 32 | 323189.3280 | 321452.3130 | 0.1026 | 31.9612 | 874.7540 | 2.7938 | 0.2889 |
| 33 | 323652.0970 | 321915.0820 | 0.1028 | 32.0030 | 874.8066 | 2.7941 | 0.2882 |
| 34 | 323606.1770 | 321869.1610 | 0.1027 | 32.0056 | 874.9316 | 2.7935 | 0.2880 |
| 35 | 323297.7700 | 321560.7550 | 0.1026 | 31.9908 | 875.1549 | 2.7921 | 0.2880 |
| 36 | 322716.7740 | 320979.7590 | 0.1024 | 31.9607 | 875.5342 | 2.7897 | 0.2879 |
| 37 | 321730.9380 | 319993.9230 | 0.1020 | 31.9091 | 876.1709 | 2.7856 | 0.2879 |
| 38 | 320101.4550 | 318364.4400 | 0.1014 | 31.8237 | 877.2292 | 2.7789 | 0.2879 |
| 39 | 317464.3140 | 315727.2990 | 0.1003 | 31.6851 | 878.9648 | 2.7679 | 0.2879 |
| 40 | 1737.0153 | 0.0000 | 0.0005 | 0.0000 | 881.7494 |  | 0.2878 |

**Table S4 Gas-liquid distribution in distillation columns**

| Serial number | Liquid-phase mass flow rate  kg/h | Gas-phase mass flow rate  kg/h | Liquid-phase volumetric flow rate  m3/h | Gas-phase volumetric flow rate  m3/h | Liquid -phase density  kg/m3 | Gas-phase density  kg/m3 | Liquid -phase viscosity  cP |
| --- | --- | --- | --- | --- | --- | --- | --- |
| 1 | 16417.8008 | 16417.8008 | 0.0052 | 1.6311 | 874.5178 | 2.7960 | 0.2879 |
| 2 | 14775.3259 | 16417.2616 | 0.0047 | 1.6311 | 874.5254 | 2.7960 | 0.2879 |
| 3 | 14774.5054 | 16416.4411 | 0.0047 | 1.6310 | 874.5368 | 2.7959 | 0.2879 |
| 4 | 14773.2585 | 16415.1942 | 0.0047 | 1.6309 | 874.5542 | 2.7958 | 0.2879 |
| 5 | 14771.3646 | 16413.3003 | 0.0047 | 1.6308 | 874.5806 | 2.7956 | 0.2879 |
| 6 | 14768.4895 | 16410.4251 | 0.0047 | 1.6307 | 874.6207 | 2.7954 | 0.2879 |
| 7 | 14764.1276 | 16406.0633 | 0.0047 | 1.6305 | 874.6816 | 2.7951 | 0.2879 |
| 8 | 14757.5173 | 16399.4530 | 0.0047 | 1.6301 | 874.7740 | 2.7945 | 0.2879 |
| 9 | 14747.5151 | 16389.4508 | 0.0047 | 1.6296 | 874.9139 | 2.7937 | 0.2879 |
| 10 | 14732.4166 | 16374.3523 | 0.0047 | 1.6288 | 875.1255 | 2.7925 | 0.2879 |
| 11 | 14709.7065 | 16351.6422 | 0.0047 | 1.6276 | 875.4445 | 2.7907 | 0.2879 |
| 12 | 14675.7306 | 16317.6663 | 0.0047 | 1.6258 | 875.9237 | 2.7879 | 0.2879 |
| 13 | 14625.3041 | 16267.2397 | 0.0046 | 1.6232 | 876.6390 | 2.7838 | 0.2879 |
| 14 | 14551.3359 | 16193.2716 | 0.0046 | 1.6193 | 877.6971 | 2.7778 | 0.2879 |
| 15 | 14444.6672 | 16086.6028 | 0.0046 | 1.6137 | 879.2419 | 2.7691 | 0.2879 |
| 16 | 14294.5092 | 15936.4448 | 0.0045 | 1.6058 | 881.4546 | 2.7567 | 0.2878 |
| 17 | 14090.0310 | 15731.9666 | 0.0044 | 1.5950 | 884.5405 | 2.7398 | 0.2878 |
| 18 | 13823.5200 | 15465.4557 | 0.0043 | 1.5810 | 888.6912 | 2.7173 | 0.2878 |
| 19 | 13494.7281 | 15136.6638 | 0.0042 | 1.5635 | 894.0178 | 2.6892 | 0.2878 |
| 20 | 14712.5668 | 14617.4871 | 0.0045 | 1.5359 | 900.4708 | 2.6436 | 0.2879 |
| 21 | 14095.9595 | 14000.8798 | 0.0043 | 1.5030 | 910.4188 | 2.5876 | 0.2883 |
| 22 | 13433.9866 | 13338.9069 | 0.0040 | 1.4675 | 921.9233 | 2.5248 | 0.2889 |
| 23 | 12790.7120 | 12695.6323 | 0.0038 | 1.4329 | 933.9729 | 2.4611 | 0.2899 |
| 24 | 12218.6185 | 12123.5388 | 0.0036 | 1.4021 | 945.4545 | 2.4018 | 0.2910 |
| 25 | 11745.3546 | 11650.2749 | 0.0034 | 1.3766 | 955.5270 | 2.3509 | 0.2923 |
| 26 | 11374.9562 | 11279.8765 | 0.0033 | 1.3565 | 963.7890 | 2.3098 | 0.2934 |
| 27 | 11096.5974 | 11001.5177 | 0.0032 | 1.3414 | 970.2240 | 2.2781 | 0.2945 |
| 28 | 10893.3667 | 10798.2870 | 0.0031 | 1.3304 | 975.0476 | 2.2545 | 0.2953 |
| 29 | 10747.9585 | 10652.8788 | 0.0031 | 1.3225 | 978.5648 | 2.2375 | 0.2959 |
| 30 | 10645.3697 | 10550.2901 | 0.0030 | 1.3170 | 981.0797 | 2.2253 | 0.2964 |
| 31 | 10573.6871 | 10478.6074 | 0.0030 | 1.3131 | 982.8536 | 2.2167 | 0.2967 |
| 32 | 10523.9311 | 10428.8515 | 0.0030 | 1.3104 | 984.0929 | 2.2107 | 0.2969 |
| 33 | 10489.5518 | 10394.4721 | 0.0030 | 1.3085 | 984.9531 | 2.2066 | 0.2971 |
| 34 | 10465.8710 | 10370.7913 | 0.0029 | 1.3072 | 985.5475 | 2.2037 | 0.2972 |
| 35 | 10449.5943 | 10354.5146 | 0.0029 | 1.3064 | 985.9569 | 2.2017 | 0.2973 |
| 36 | 10438.4231 | 10343.3434 | 0.0029 | 1.3057 | 986.2382 | 2.2004 | 0.2973 |
| 37 | 10430.7636 | 10335.6840 | 0.0029 | 1.3053 | 986.4314 | 2.1995 | 0.2974 |
| 38 | 10425.5155 | 10330.4359 | 0.0029 | 1.3050 | 986.5638 | 2.1988 | 0.2974 |
| 39 | 10421.9214 | 10326.8417 | 0.0029 | 1.3048 | 986.6545 | 2.1984 | 0.2974 |
| 40 | 95.0797 | 0.0000 | 0.0000 | 0.0000 | 986.7167 |  | 0.2974 |
